# Supplementary material
Source: publisher figshare collection journal article supplement (https://sage.figshare.com/ndownloader/files/15473273)
Supplement: Supplementary file 1 [file 15473273]

**Figure 1.** The evaluation system of monitoring risk for deep excavation.

**Figure 2.** Process of monitoring risk evaluation.

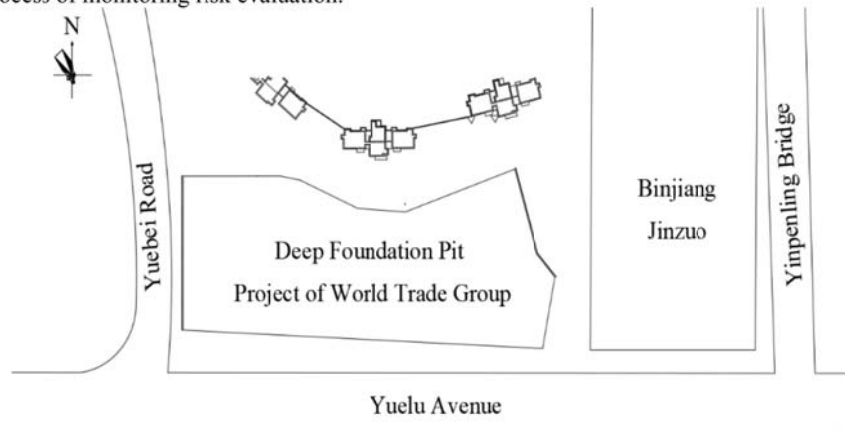

**Figure 3.** Layout of deep foundation pit.

**Table 1.** Comparison of the importance of evaluation indexes.

| scale      | Definition                                             | Explanation                                                                                     |
|------------|--------------------------------------------------------|-------------------------------------------------------------------------------------------------|
| 1          | Equal importance                                       | Two activities contribute equally to the objective                                              |
| 3          | Weak importance of one over another                    | Experience and judgment slight favor one activity over another                                  |
| 5          | Essential or strong importance                         | Experience and judgment strongly favor one activity over another                                |
| 7          | Demonstrated importance                                | An activity is strongly favored and its dominance is demonstrated in practice                   |
| 9          | Absolutely importance                                  | The evidence favoring one activity over another is of the highest possible order of affirmation |
| 2, 4, 6, 8 | Intermediate values between the two adjacent judgments | The importance is between two adjacent scales.                                                  |
| Inverse    | In contrast to the above                               |                                                                                                 |

**Table 2.** Random indexes.<sup>25</sup>

| order | RI   | order | RI   | order | RI   |
|-------|------|-------|------|-------|------|
| 1     | 0    | 6     | 1.25 | 11    | 1.52 |
| 2     | 0    | 7     | 1.35 | 12    | 1.54 |
| 3     | 0.52 | 8     | 1.40 | 13    | 1.56 |
| 4     | 0.89 | 9     | 1.45 | 14    | 1.58 |
| 5     | 1.11 | 10    | 1.49 | 15    | 1.59 |

**Table 3.** Weight of experts' comments.

| Experts' comments<br>( $W_c$ ) | Minimal | Very small | smaller | medium | larger | Very large | maximal |
|--------------------------------|---------|------------|---------|--------|--------|------------|---------|
| Risk probability<br>( $w_k$ )  | 0.1     | 0.2        | 0.4     | 0.5    | 0.6    | 0.8        | 0.9     |

**Table 4.** Risk acceptance criteria.

| Grade   | Evaluation value () | Acceptance degree                                 | Suggestions or measures                                               | Whether alarming |
|---------|---------------------|---------------------------------------------------|-----------------------------------------------------------------------|------------------|
| Level 1 | 0 ~ 0.2             | Negligible                                        | Daily inspection and monitoring                                       | No               |
| Level 2 | 0.2 ~ 0.4           | Admissible but needing to pay little attention to | Strengthening daily inspection and management                         | No               |
| Level 3 | 0.4 ~ 0.6           | Acceptable but needing to pay much attention to   | Needing prevention, analyzing the causes and strengthening monitoring | Yes              |
| Level 4 | 0.6 ~ 0.8           | Unsuitable to accept                              | Alarming for engineering and improving monitoring frequency           | Yes              |
| Level 5 | 0.8 ~ 1.0           | Refusing to accept                                | Stopping construction and activating contingency plan immediately     | Yes              |

**Table 5.** Judgment matrix of the weight of risk indexes.

| Judgment index | $u_{11}$ | $u_{12}$ | $u_{13}$ | $u_{14}$ | $u_{15}$ | $u_{21}$ | $u_{22}$ | $u_{23}$ | $u_{31}$ | $u_{32}$ | $u_{33}$ |
|----------------|----------|----------|----------|----------|----------|----------|----------|----------|----------|----------|----------|
| $u_{11}$       | 1        | 1/3      | 1/4      | 1/6      | 1/6      | 1/5      | 1/5      | 1/5      | 1/9      | 1/6      | 1/7      |
| $u_{12}$       | 3        | 1        | 1/2      | 1/3      | 1/3      | 1/2      | 1/2      | 1/2      | 4        | 2        | 2        |
| $u_{13}$       | 4        | 2        | 1        | 1/3      | 1/3      | 1/2      | 1/2      | 1/2      | 3        | 2        | 2        |
| $u_{14}$       | 6        | 3        | 3        | 1        | 1        | 1/2      | 1/2      | 1/2      | 2        | 1        | 1        |
| $u_{15}$       | 6        | 3        | 3        | 1        | 1        | 1/2      | 1/2      | 1/2      | 2        | 1        | 1        |
| $u_{21}$       | 5        | 2        | 2        | 2        | 2        | 1        | 1        | 1        | 2        | 2        | 1        |
| $u_{22}$       | 5        | 2        | 2        | 2        | 2        | 1        | 1        | 1        | 2        | 2        | 1        |
| $u_{23}$       | 5        | 2        | 2        | 2        | 2        | 1        | 1        | 1        | 2        | 2        | 1/2      |
| $u_{31}$       | 9        | 1/4      | 1/3      | 1/2      | 1/2      | 1/2      | 1/2      | 1/2      | 1        | 1/2      | 1        |
| $u_{32}$       | 6        | 1/2      | 1/2      | 1        | 1        | 1/2      | 1/2      | 1/2      | 2        | 1        | 1        |
| $u_{33}$       | 7        | 1/2      | 1/2      | 1        | 1        | 1        | 1        | 2        | 1        | 1        | 1        |

## References

- Li Y, Geng SB, Zhang XS and Zhang H. Study of thermal comfort in underground construction based on field measurements and questionnaires in China. *Building and Environment* 2017; 116: 45-54.
- You XH, He GY, Wang QX and Zhang L. Current status and development trend of urban underground space in China. *Tunnel Construction* 2019; 39(2): 173-188.
- Simankina T, Braila N and Kanyukova S. Reclamation trend of underground construction. *Procedia Engineering* 2016; 165: 1757-1765.
- Mitew-Czajewska M. A study of displacements of structures in the vicinity of deep excavation. *Archives of Civil and Mechanical Engineering* 2019; 19(2): 47-556.
- Cao SJ, Deng HY, Zhou XQ and Deng YL. Ventilation inlets design based on ventilation performance assessment using a dimensionless time scale. *Indoor and Built Environment* 2018; 1420326X18815321.
- Kaoula D and Bouchair A. Evaluation of environmental impacts of hotel buildings having different envelopes using a life cycle analysis approach. *Indoor and Built Environment* 2018; 27(4): 561-580.
- Li X, Liu X, Li CZ, Hu ZM, Shen QP and Huang ZY. Foundation pit displacement monitoring and prediction using least squares support vector machines based on multi-point measurement. *Structural Health Monitoring* 2018; 147592171876793.
- Guly SA. The study of the ground freezing method using natural cold to protect the foundation pit from groundwater inflow. *Inzenerno - Stroitel'Nyj Zurnal* 2015; 3: 29-37,95-97.
- Fearnhead N, Maniscalco K, Standing JR and Wan MSP. Deep excavations: monitoring mechanisms of ground displacement. *Proceedings of the Institution of Civil Engineers-Geotechnical Engineering* 2014; 167(2): 117-129.
- Einstein HH and Mines US. *Risk analysis for rock slopes in open pit mines*. NTIS, 1981.
- Einstein HH and Karam KS. *Risk assessment and uncertainties*. Essen: VGE, 2001; 457-488.
- Duzgun H and Einstein HH. Assessment and management of roof fall risks in underground coal mines. *Safety*

- science* 2004; 42(1): 23-41.
13. Wang YM, Li MF, Tan D, Liang XH and Xu Y. Research on deformation forewarning and safety supervision system for building excavation engineering in Nanjing area. *China Civil Engineering Journal* 2015; 48(S2): 143-147.
  14. Xiong ZM, Lu H, Wang MY, Qian QH and Rong XL. Research progress on safety risk management for large scale geotechnical engineering construction in China. *Rock and Soil Mechanics* 2018; 39(10): 3703-3716.
  15. Liu B, Wang KQ and Huang M. Research on fuzzy hierarchical risk assessment of metro deep excavation pit. *Chinese Journal of Underground Space and Engineering* 2015; 11(S1): 257-264.
  16. Du XL, Zhang XF, Zhang MJ and Hou BW. Risk synthetic assessment for deep pit construction based on evidence theory. *Chinese Journal of Geotechnical Engineering* 2014; 36(01): 155-161.
  17. Zhang LM. *Study on risk management of deep foundation pit monitoring project*. PhD thesis, Tianjin University, 2012.
  18. Li JJ, Wang WD, Di GE and Wu JB. Analysis of the influence of excavation engineering on additional deformation of adjacent buildings. *Rock and Soil Mechanics* 2007; 28(S1): 623-629.
  19. GB 50497-2009, *Technical Code for Monitoring of Building Excavation Engineering*. Beijing: China Planning Press, 2009.
  20. JGJ 120-2012. *Technical specification for retaining and protection of building foundation excavation*. Beijing: China Architecture & Building Press, 2012.
  21. Zadeh LA, Fu KS, Tanaka K, Shimura M and Negoita CV. Fuzzy sets and their applications to cognitive and decision processes. *IEEE Transactions on Systems, Man and Cybernetics* 1977; 7:122-123.
  22. Yan FF, Wei CP and Ge SN. Entropy measures for dual hesitant fuzzy sets and their application of multi-attribute decision-making. *Mathematics in practice and theory* 2018; 48(17): 131-139.
  23. Wang LF and Xu SB. *Introduction to the analytic hierarchy process*. Beijing: China Renmin University Press, 1990.
  24. Saaty TL and Vargas LG. Estimating technological coefficients by the analytic hierarchy process. *Socio-Economic Planning Sciences* 1979; 13(6): 333-336.
  25. Saaty TL and Tran LT. On the invalidity of fuzzifying numerical judgment in the analytic Hierarchy Process. *Mathematical and Computer Modelling* 2007; 46: 962-975.
